# Supplementary material for: Superconductivity and superionic behaviors of Kagome lattices in Li–Si compounds under high pressure
Source: Royal Society of Chemistry journal article supplement (doi:10.1039/d4tc00252k), 2024-01-01
Supplement: d4tc00252k1.pdf [file d4tc00252k1.pdf]

# Supplementary Material for

## Superconductivity and superionic behaviors of Kagome lattice in Li-Si compounds under high pressure

Xinwei Wang, Bohan Cao, Wenting Tang, Mengxin Yang,

Jiajin Chen, Shi Chen, Mengrui Zhang, Fubo Tian<sup>\*</sup>, and Liang Li<sup>\*</sup>

*State Key Laboratory of Superhard Materials, College of Physics, Jilin University, Changchun 130012,*

*People's Republic of China*

---

<sup>\*</sup> Corresponding authors.

*E-mail addresses:* [tianfb@jlu.edu.cn](mailto:tianfb@jlu.edu.cn) (F.B. Tian) and [liliang@jlu.edu.cn](mailto:liliang@jlu.edu.cn) (L. Li).

**Contents**

|                                                                                                                                   |    |
|-----------------------------------------------------------------------------------------------------------------------------------|----|
| 1. Computational details                                                                                                          | 3  |
| 2. Dimensionality of the ISQs of $\text{Li}_x\text{Si}$ ( $x = 1-8$ )                                                             | 4  |
| 3. Phonon dispersion curves for $\text{Li}_x\text{Si}$ ( $x = 1-8$ ) and $\text{Li}_5X$ ( $X = \text{Ge}, \text{Sn}, \text{Sb}$ ) | 5  |
| 4. Features of Kagome lattices formed by ISQs                                                                                     | 7  |
| 5. Energy bands of Kagome lattice                                                                                                 | 8  |
| 6. Contribution of ISQs to the DOS in Kagome lattice                                                                              | 9  |
| 7. Temperature, pressure, and energy versus time in the $\text{Li}_5\text{Si}-P6/mmm$                                             | 10 |
| 8. Temperature, pressure, and energy versus time in the $\text{Li}_6\text{Si}-C2/m$                                               | 12 |
| 9. Lattice parameters of the predicted stable Li-Si compounds                                                                     | 14 |
| 10. References                                                                                                                    | 15 |

The VASP package [S1] is applied to perform density functional theory (DFT) [S2,S3] calculations, with the projected augmented wave pseudopotentials method [S4] to describe the electron-ion interaction, using  $1s^22s^1$ ,  $2s^22p^2$ ,  $2s^22p^3$ ,  $3s^23p^2$ ,  $3s^23p^3$ ,  $4s^24p^2$ ,  $4s^24p^3$ ,  $5s^25p^2$ , and  $5s^25p^3$  valence electronic structures of Li, C, N, Si, P, Ge, As, Sn, and Sb, respectively. The ionic positions and cell parameters are optimized with the criteria of energy and forces being  $10^{-5}$  eV and  $0.002$  eV/Å, respectively. A sphere with a Wigner-Seitz radius of  $1.20$  Å is used to obtain the projected density of states on the interstitial position. In *ab initio* molecular dynamics (AIMD) simulations for each temperature, the volume of the simulated system is adjusted to ensure that the pressure varies over a range of less than 1 GPa. The cutoff energy is set 600 eV. We computed the electron-phonon coupling strength and solved the Eliashberg equation. Based on the theory of traditional superconductivity BCS theory and Allen-McMillan equation [S5-S9]:

$$T_c = \frac{\omega_{\log}}{1.2} \exp\left[\frac{-1.04(1+\lambda)}{\lambda(1-0.62\mu^*)-\mu^*}\right]. \quad (1)$$

Typical Coulomb pseudopotential parameter  $\mu^*$  are set with  $\mu^* = 0.1$ . The integrated EPC strength  $\lambda$  is given by:

$$\lambda = 2 \int_0^\infty \frac{\alpha^2 F(\omega)}{\omega} d\omega. \quad (2)$$

Eliashberg spectral function is obtained by:

$$\alpha^2 F(\omega) = \frac{1}{2\pi N(\epsilon_F)} \sum_{\mathbf{q}\nu} \frac{\gamma_{\mathbf{q}\nu}}{\omega_{\mathbf{q}\nu}} \delta(\omega - \omega_{\mathbf{q}\nu}) \quad (3)$$

Phonon wave vector is labeled by  $\mathbf{q}$  and  $\omega_{\mathbf{q}\nu}$  represent phonon frequency mode  $\nu$  at  $\mathbf{q}$ . Frequency moments  $\omega_{\log}$  are calculated by:

$$\omega_{\log} = \exp\left[\frac{2}{\lambda} \int_0^\infty \frac{d\omega}{\omega} \alpha^2 F(\omega)\right]. \quad (4)$$

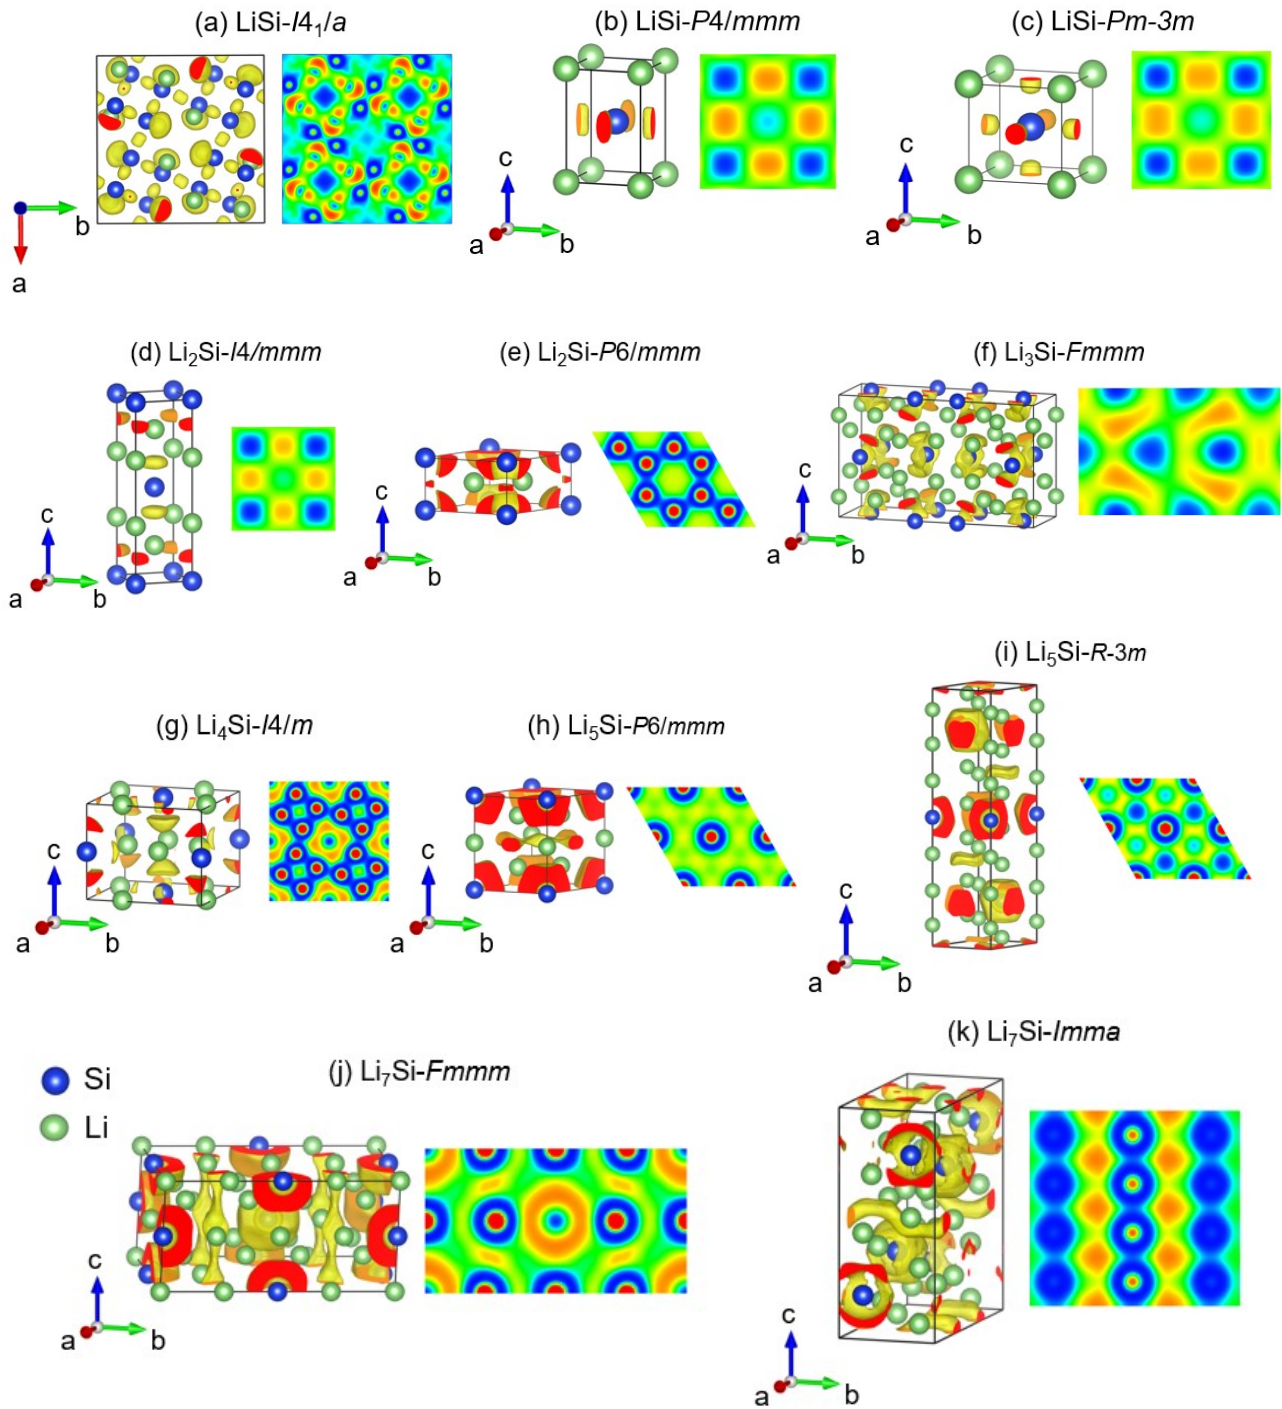

**Fig. S1.** Charge densities as well as electron localization functions of the Li-Si system: (a)  $\text{LiSi-I4}_1/a$  at 0 GPa, (b)  $\text{LiSi-P4/mmm}$  at 20 GPa, (c)  $\text{LiSi-Pm-3m}$  at 120 GPa, (d)  $\text{Li}_2\text{Si-I4/mmm}$  at 120 GPa, (e)  $\text{Li}_2\text{Si-P6/mmm}$  at 50 GPa, (f)  $\text{Li}_3\text{Si-Fmmm}$  at 100 GPa, (g)  $\text{Li}_4\text{Si-I4/m}$  at 45 GPa, (h)  $\text{Li}_5\text{Si-P6/mmm}$  at 10 GPa, (i)  $\text{Li}_6\text{Si-P6/mmm}$  at 10 GPa, (j)  $\text{Li}_7\text{Si-Fmmm}$  at 0 GPa, and (k)  $\text{Li}_7\text{Si-Imma}$  at 0 GPa. From the results of these analyses, it can be observed that the dimensionality of the ISQs covers 0D, 1D, and 2D.

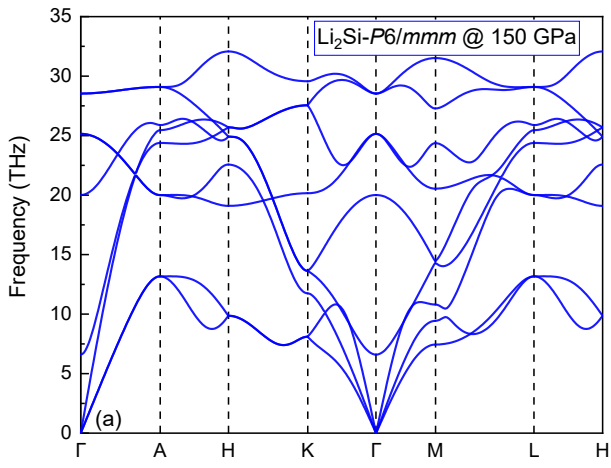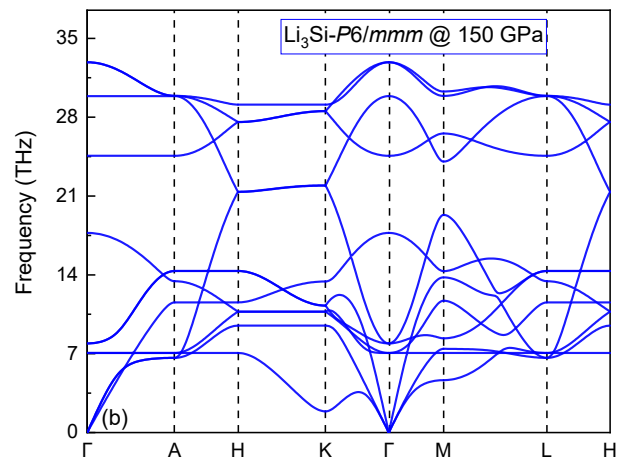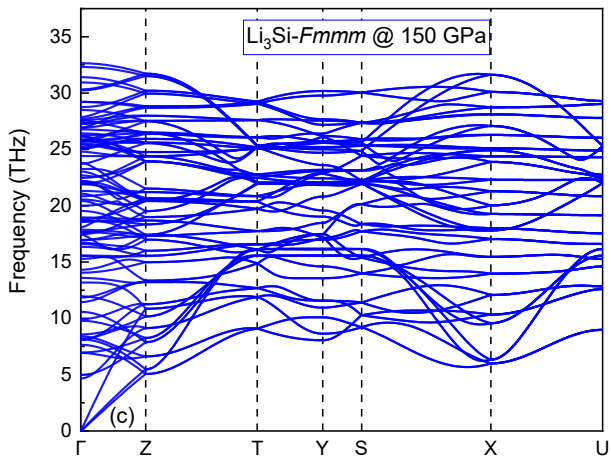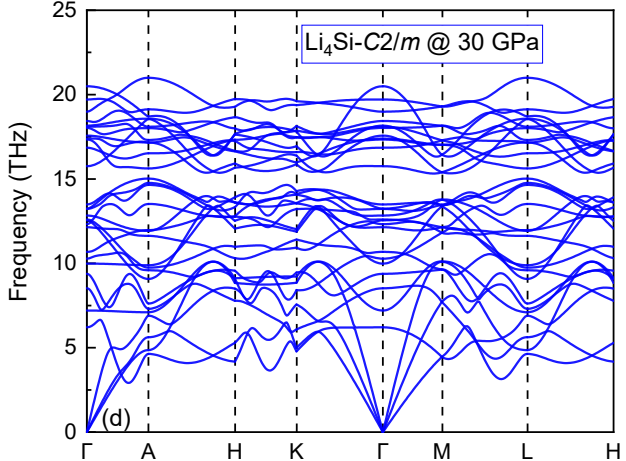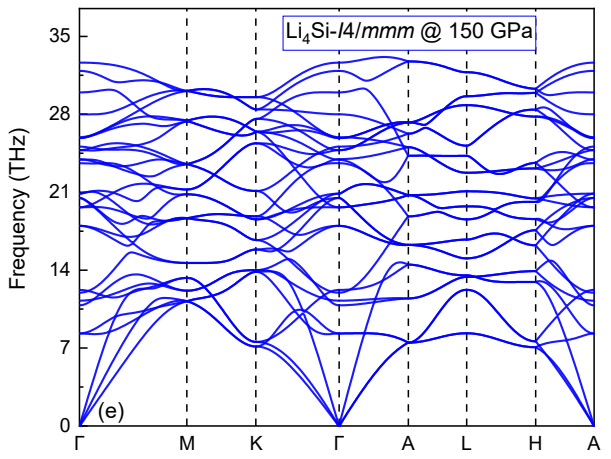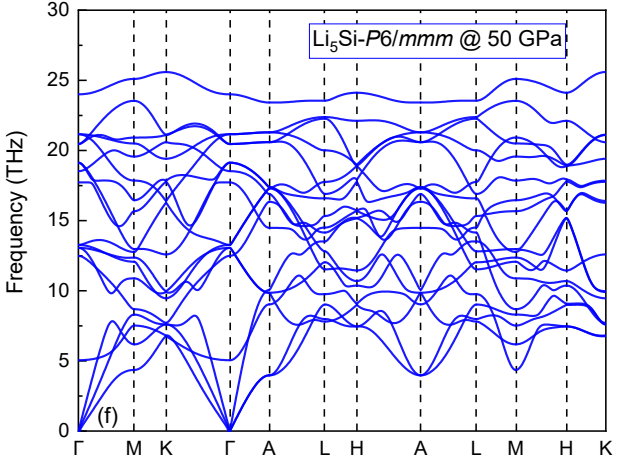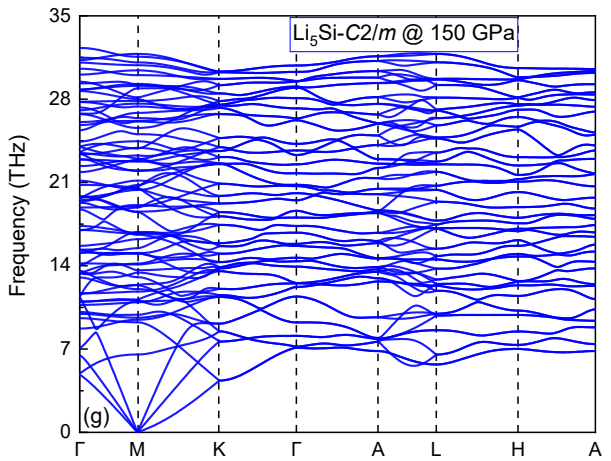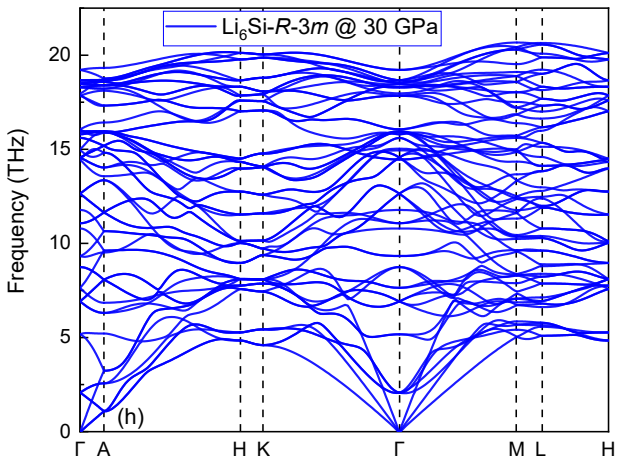

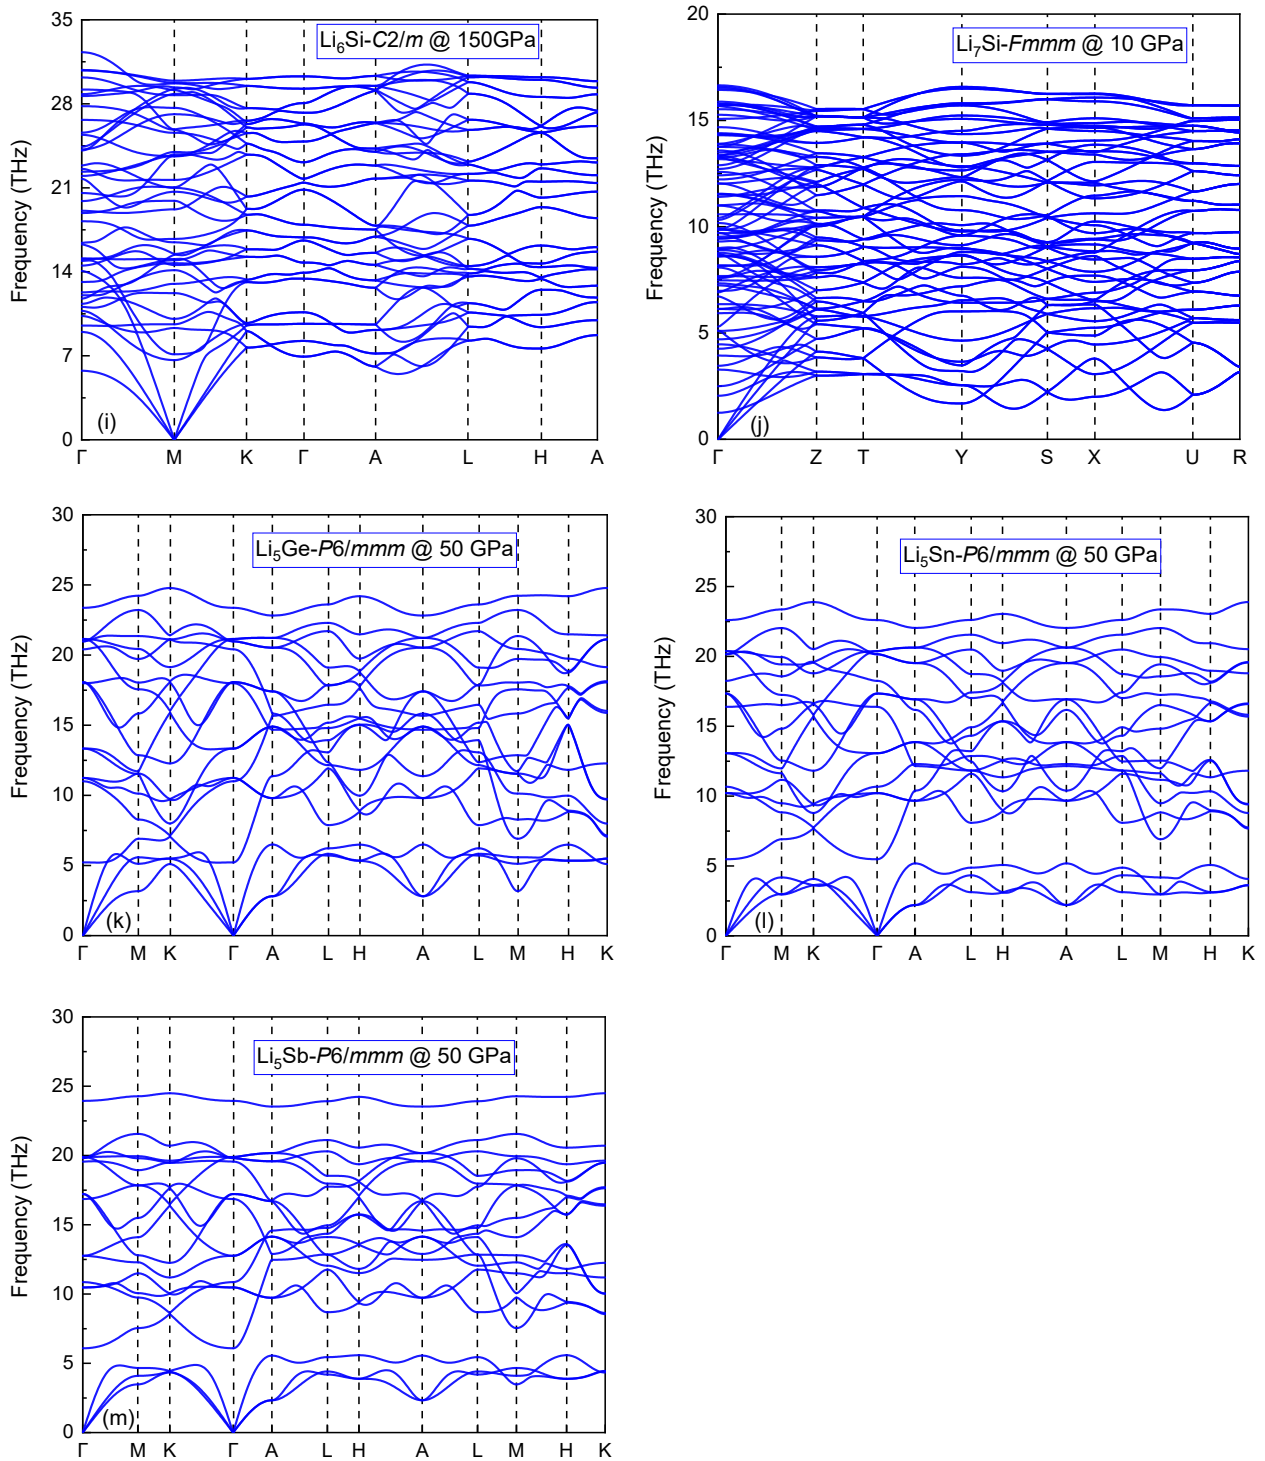

**Fig. S2.** Phonon dispersion curves for the corresponding structures of Li-Si, Li-Ge, Li-Sn, and Li-Sb systems: (a)  $\text{Li}_2\text{Si-P6/mmm}$  at 150 GPa, (b)  $\text{Li}_3\text{Si-P6/mmm}$  at 150 GPa, (c)  $\text{Li}_3\text{Si-Fmmm}$  at 150 GPa, (d)  $\text{Li}_4\text{Si-C2/m}$  at 30 GPa, (e)  $\text{Li}_4\text{Si-I4/mmm}$  at 150 GPa, (f)  $\text{Li}_5\text{Si-P6/mmm}$  at 50 GPa, (g)  $\text{Li}_5\text{Si-C2/m}$  at 150 GPa, (h)  $\text{Li}_6\text{Si-R-3m}$  at 30 GPa, (i)  $\text{Li}_6\text{Si-C2/m}$  at 150 GPa, (j)  $\text{Li}_7\text{Si-Fmmm}$  at 10 GPa, (k)  $\text{Li}_5\text{Ge-P6/mmm}$  at 50 GPa, (l)  $\text{Li}_5\text{Sn-P6/mmm}$  at 50 GPa, and (m)  $\text{Li}_5\text{Sb-P6/mmm}$  at 50 GPa. The calculated phonon dispersion curves have no imaginary frequencies.

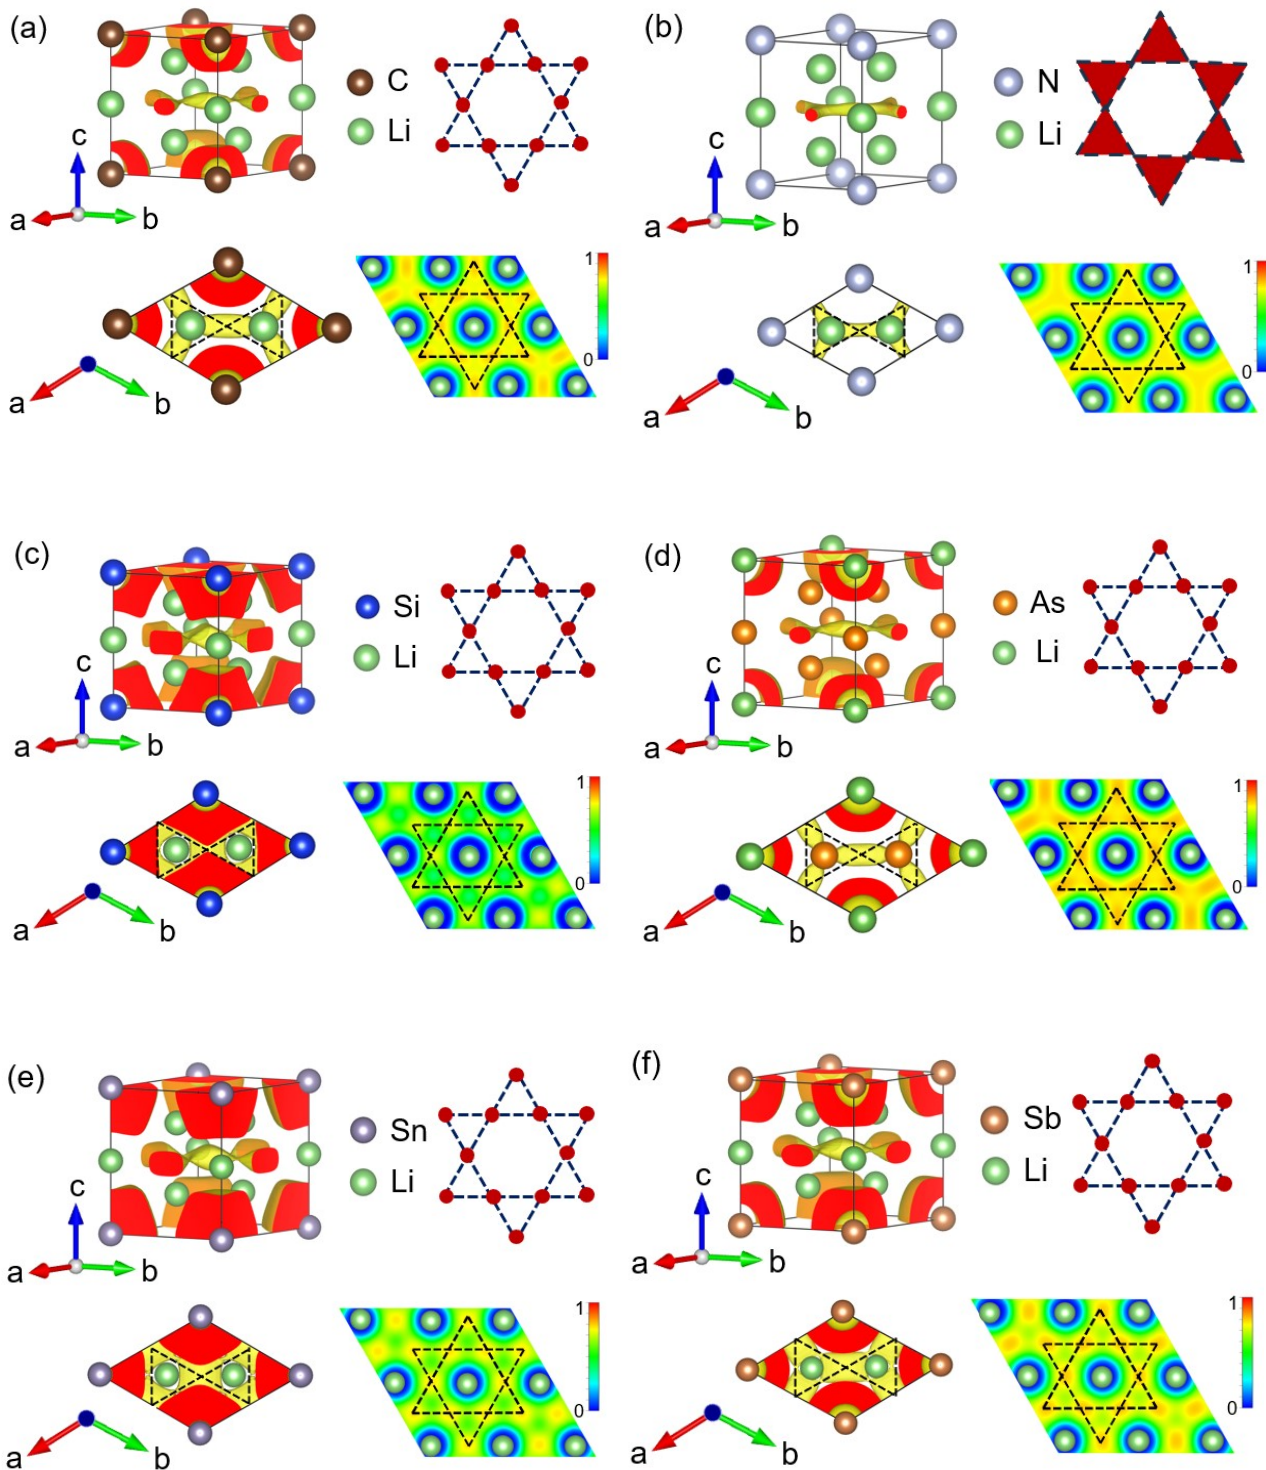

**Fig. S3.** Atomic structures, charge densities, and electron localization functions of the  $P6/mmm$  phases: (a)  $\text{Li}_5\text{C}-P6/mmm$  at 50 GPa with isovalue = 0.75, (b)  $\text{Li}_5\text{N}-P6/mmm$  at 150 GPa with isovalue = 0.89, (c)  $\text{Li}_5\text{Si}-P6/mmm$  at 50 GPa with isovalue = 0.55, (d)  $\text{Li}_5\text{As}-P6/mmm$  at 40 GPa with isovalue = 0.78, (e)  $\text{Li}_5\text{Sn}-P6/mmm$  at 50 GPa with isovalue = 0.6, and (f)  $\text{Li}_5\text{Sb}-P6/mmm$  at 50 GPa with isovalue = 0.65.

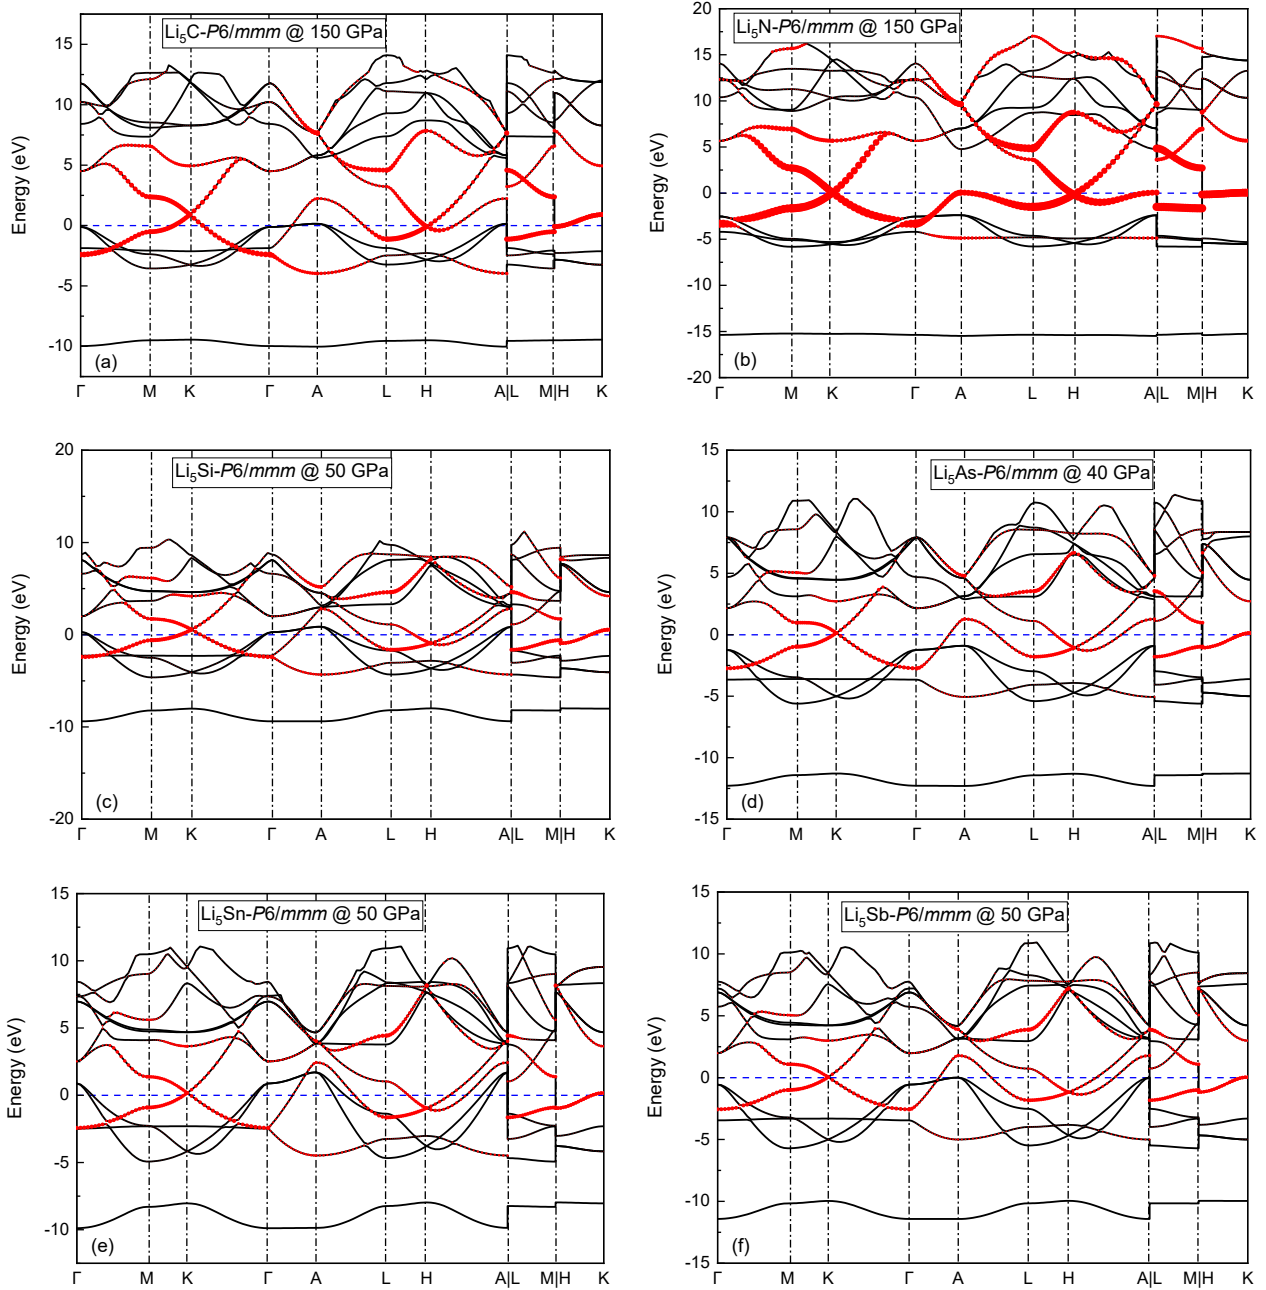

**Fig. S4.** Energy bands of Kagome lattice formation: (a)  $\text{Li}_5\text{C-P6/mmm}$  at 150 GPa, (b)  $\text{Li}_5\text{N-P6/mmm}$  at 150 GPa, (c)  $\text{Li}_5\text{Si-P6/mmm}$  at 50 GPa, (d)  $\text{Li}_5\text{As-P6/mmm}$  at 40 GPa, (e)  $\text{Li}_5\text{Sn-P6/mmm}$  at 50 GPa, and (f)  $\text{Li}_5\text{Sb-P6/mmm}$  at 50 GPa.



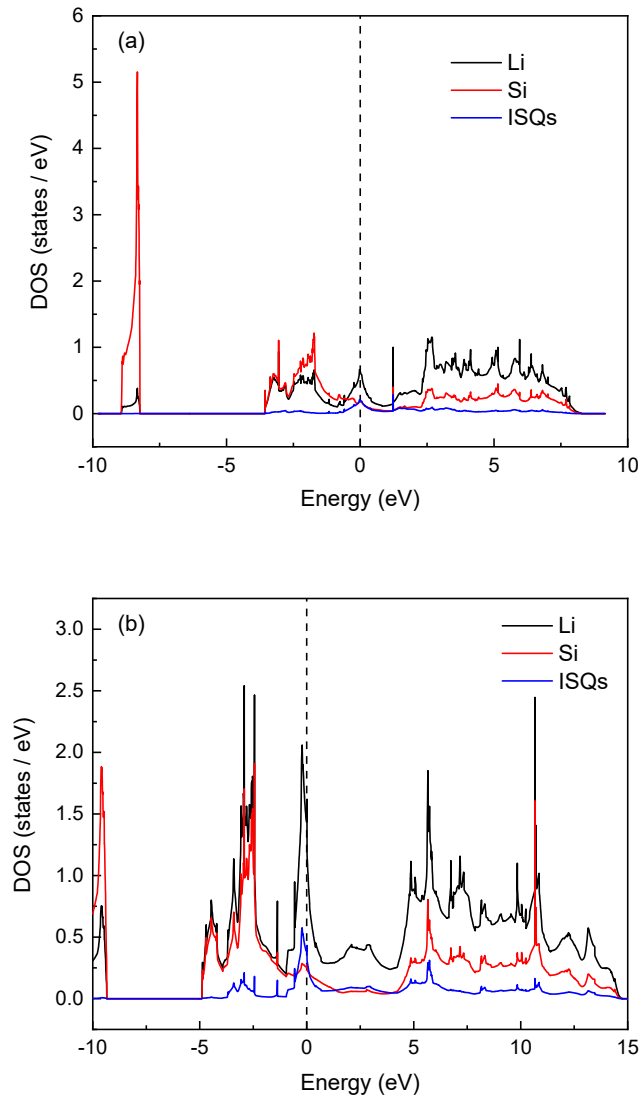

**Fig. S5.** Contribution of ISQs to the density of states in the  $\text{Li}_5\text{P-P6}/mmm$  phase: (a) at 0 GPa and (b) at 100 GPa.

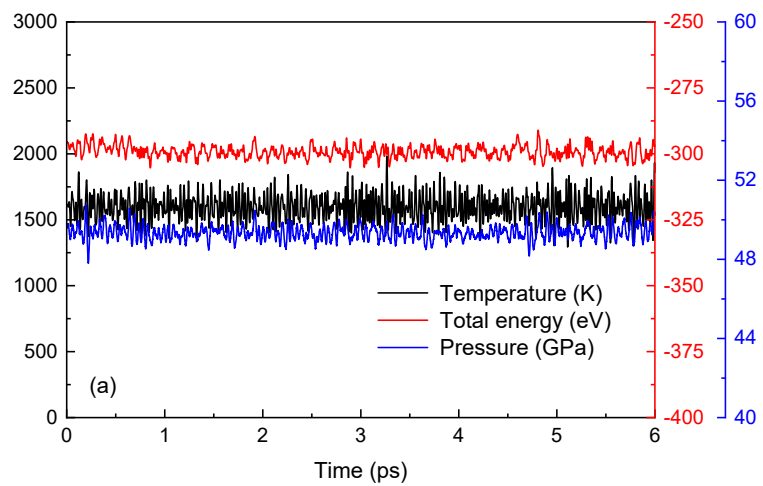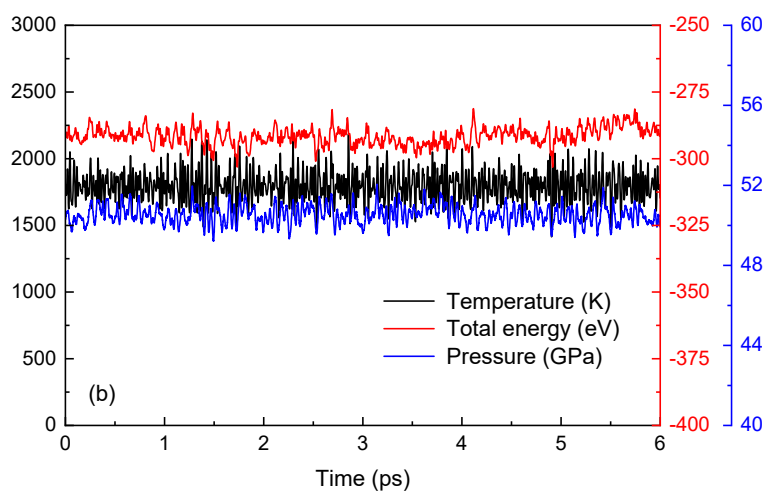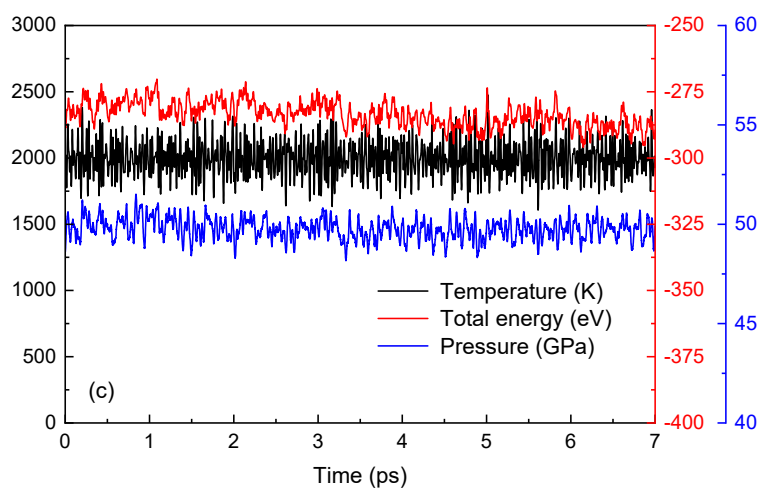

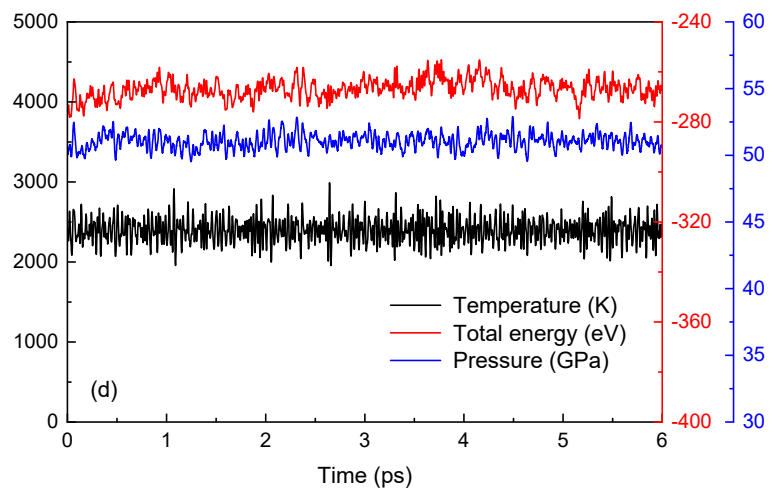

**Fig. S6.** Temperature, pressure, and energy versus time in the  $\text{Li}_5\text{Si-P6}/mmm$  phase at (a) 1600 K, (b) 1800 K, (c) 2000 K, and (d) 2400 K. The results indicate that the corresponding systems are highly stable.

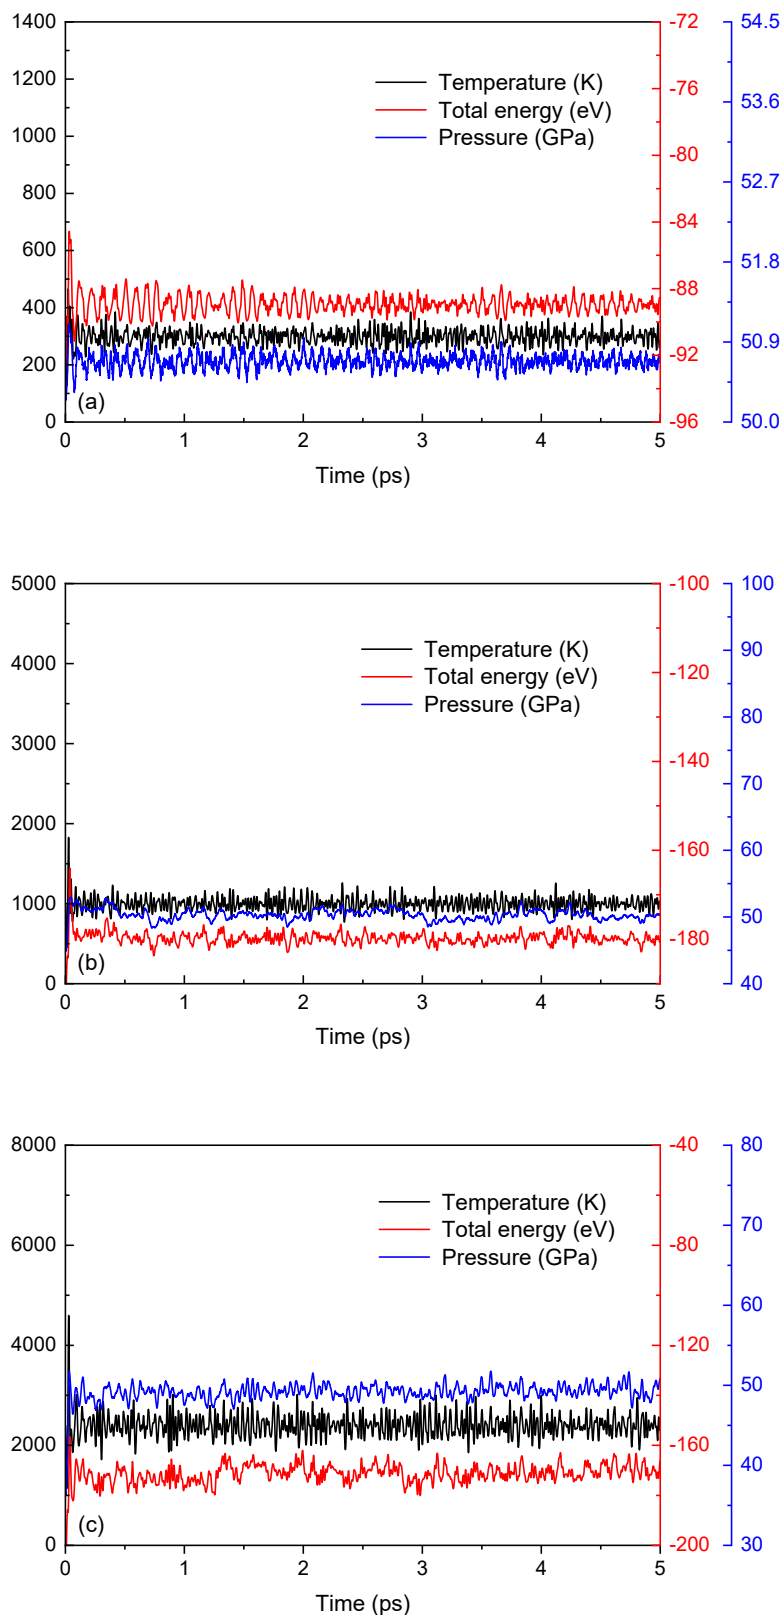

**Fig. S7.** Temperature, pressure, and energy versus time in the  $\text{Li}_6\text{Si-C2/m}$  phase at pressure of 50 GPa: (a) 300 K, (b) 1000 K, and (c) 2200 K.

**Table S1** Lattice parameters, atomic coordinates, and equivalent isotropic displacement parameters of the predicted stable Li-Si phases.

| Compounds & Pressures                                 | Lattice parameters (Å)         | Wyckoff positions | $x$      | $y$      | $z$      |
|-------------------------------------------------------|--------------------------------|-------------------|----------|----------|----------|
| <b>Li<sub>3</sub>Si</b><br><i>P6/mmm</i><br>(150 GPa) | $a = 3.76060$ $\alpha = 90$    | Li (3g)           | 0.50000  | 0.50000  | 0.50000  |
|                                                       | $b = 3.76060$ $\beta = 90$     | Si (1a)           | 0.00000  | 0.00000  | 0.00000  |
|                                                       | $c = 2.03850$ $\gamma = 120$   |                   |          |          |          |
| <b>Li<sub>4</sub>Si</b><br><i>C2/m</i><br>(0 GPa)     | $a = 7.68420$ $\alpha = 90$    | Li1 (4i)          | 0.40293  | 1.50000  | 1.10653  |
|                                                       | $b = 4.46665$ $\beta = 138.84$ | Li2 (4i)          | 1.22734  | 1.50000  | 2.33982  |
|                                                       | $c = 6.79514$ $\gamma = 90$    | Si (2d)           | 0.00000  | 0.50000  | 0.50000  |
| <b>Li<sub>4</sub>Si</b><br><i>I4/mmm</i><br>(150 GPa) | $a = 4.10054$ $\alpha = 90$    | Li (8j)           | -0.50000 | 0.20200  | 0.00000  |
|                                                       | $b = 4.10054$ $\beta = 90$     | Si (2a)           | -1.00000 | -0.00000 | -0.00000 |
|                                                       | $c = 3.46897$ $\gamma = 90$    |                   |          |          |          |
| <b>Li<sub>5</sub>Si</b><br><i>P6/mmm</i><br>(10 GPa)  | $a = 4.09674$ $\alpha = 90$    | Li1 (4h)          | 0.66667  | 0.33333  | 0.21845  |
|                                                       | $b = 4.09674$ $\beta = 90$     | Li2 (1b)          | 0.00000  | -0.00000 | 1.50000  |
|                                                       | $c = 5.05114$ $\gamma = 120$   | Si (1a)           | 0.00000  | 0.00000  | 0.00000  |
| <b>Li<sub>5</sub>Si</b><br><i>C2/m</i><br>(150 GPa)   | $a = 5.57710$ $\alpha = 90$    | Li1 (8j)          | -0.20659 | 0.20248  | -0.57364 |
|                                                       | $b = 4.08330$ $\beta = 128.17$ | Li2 (4g)          | -0.00000 | 0.79335  | -0.00000 |
|                                                       | $c = 7.39580$ $\gamma = 90$    | Li3 (4i)          | -0.16247 | 0.50000  | -0.70064 |
|                                                       |                                | Li4 (4i)          | 0.05659  | 0.50000  | -0.13898 |
|                                                       |                                | Si (4i)           | -0.39953 | 0.50000  | -0.21960 |
| <b>Li<sub>6</sub>Si</b><br><i>R-3m</i><br>(30 GPa)    | $a = 3.82830$ $\alpha = 90$    | Li1 (6c)          | 1.33333  | -0.33333 | 0.45743  |
|                                                       | $b = 3.82830$ $\beta = 90$     | Li2 (6c)          | 0.66667  | -0.66667 | 0.24630  |
|                                                       | $c = 16.3242$ $\gamma = 120$   | Li3 (6c)          | 0.33333  | -0.33333 | 0.03736  |
|                                                       |                                | Si (3b)           | 1.00000  | -1.00000 | 0.50000  |
| <b>Li<sub>6</sub>Si</b><br><i>C2/m</i><br>(150 GPa)   | $a = 5.84224$ $\alpha = 90$    | Li1 (8j)          | 0.67289  | -0.28609 | 0.12204  |
|                                                       | $b = 4.12375$ $\beta = 114.52$ | Li2 (4i)          | 0.09351  | -0.50000 | -1.61285 |
|                                                       | $c = 3.57250$ $\gamma = 90$    | Si (2c)           | 0.50000  | -0.50000 | -0.50000 |
| <b>Li<sub>7</sub>Si</b><br><i>Fmmm</i><br>(10 GPa)    | $a = 11.5614$ $\alpha = 90$    | Li1 (16l)         | 0.10988  | 0.25000  | -0.25000 |
|                                                       | $b = 6.37239$ $\beta = 90$     | Li2 (8g)          | -0.27723 | 0.50000  | -0.50000 |
|                                                       | $c = 5.54330$ $\gamma = 90$    | Li3 (4a)          | -0.00000 | 0.50000  | -0.50000 |
|                                                       |                                | Si (4b)           | -0.00000 | 1.00000  | -0.50000 |
| <b>Li<sub>7</sub>Si</b><br><i>Fmmm</i><br>(50 GPa)    | $a = 8.06591$ $\alpha = 90$    | Li1 (8i)          | -0.21949 | -0.25000 | 0.62665  |
|                                                       | $b = 3.76992$ $\beta = 90$     | Li2 (8i)          | 0.12269  | -0.25000 | 1.06029  |
|                                                       | $c = 8.72480$ $\gamma = 90$    | Li3 (4e)          | -0.00000 | -0.25000 | 0.53773  |
|                                                       |                                | Li4 (4e)          | 0.00000  | -0.25000 | 0.80904  |
|                                                       |                                | Si (8i)           | 0.37478  | 0.25000  | 0.80231  |
| <b>Li<sub>7</sub>Si</b><br><i>C2/m</i><br>(150 GPa)   | $a = 5.89769$ $\alpha = 90$    | Li1 (8j)          | 0.55361  | -0.31084 | 0.38060  |
|                                                       | $b = 4.06788$ $\beta = 134.03$ | Li2 (8j)          | 0.78201  | -0.20446 | 0.94002  |
|                                                       | $c = 10.3443$ $\gamma = 90$    | Li3 (4i)          | 0.17368  | -0.50000 | 0.15590  |
|                                                       |                                | Li4 (4i)          | 0.89942  | -0.50000 | 0.70442  |

|                         |               |                  |          |          |          |          |
|-------------------------|---------------|------------------|----------|----------|----------|----------|
|                         |               |                  | Li5 (4i) | 0.63762  | -0.50000 | 0.22065  |
|                         |               |                  | Si (4h)  | 0.50000  | -0.80071 | 0.50000  |
| <b>Li<sub>8</sub>Si</b> | $a = 4.40650$ | $\alpha = 90$    | Li1 (2c) | 1.00000  | 1.00000  | 0.69121  |
| <i>R-3m</i>             | $b = 4.40650$ | $\beta = 90$     | Li2 (2d) | 1.33333  | 0.66667  | 0.45634  |
| (0 GPa)                 | $c = 8.43180$ | $\gamma = 120$   | Li3 (2d) | 0.66667  | 0.33333  | 0.17924  |
|                         |               |                  | Li4 (2d) | 0.66667  | 0.33333  | -0.10385 |
|                         |               |                  | Si (1a)  | 1.00000  | 1.00000  | 0.00000  |
| <b>Li<sub>8</sub>Si</b> | $a = 5.97224$ | $\alpha = 90$    | Li1 (8j) | 0.50867  | -0.18891 | 0.21749  |
| <i>C2/m</i>             | $b = 4.01358$ | $\beta = 144.78$ | Li2 (4i) | -0.01120 | -0.00000 | -0.64065 |
| (150 GPa)               | $c = 7.10957$ | $\gamma = 120$   | Li3 (4g) | 0.50000  | -0.30192 | -0.00000 |
|                         |               |                  | Si (2d)  | 0.00000  | -0.50000 | -0.50000 |
| <b>Li<sub>5</sub>Ge</b> | $a = 4.35430$ | $\alpha = 90$    | Li1 (1b) | -1.00000 | 0.00000  | -0.50000 |
| <i>P6/mmm</i>           | $b = 4.35430$ | $\beta = 90$     | Li2 (4h) | -0.66667 | 0.66667  | -0.78023 |
| (0 GPa)                 | $c = 5.35750$ | $\gamma = 120$   | Si (1a)  | -1.00000 | 0.00000  | -0.00000 |
| <b>Li<sub>5</sub>Sn</b> | $a = 4.68550$ | $\alpha = 90$    | Li1 (4h) | 0.66667  | 0.33333  | 0.22681  |
| <i>P6/mmm</i>           | $b = 4.68550$ | $\beta = 90$     | Li2 (1b) | 0.00000  | 0.00000  | 0.50000  |
| (0 GPa)                 | $c = 5.75500$ | $\gamma = 120$   | Si (1a)  | 0.00000  | 0.00000  | 0.00000  |
| <b>Li<sub>5</sub>Sb</b> | $a = 4.52590$ | $\alpha = 90$    | Li1 (4h) | 0.66667  | -0.66667 | -0.76225 |
| <i>P6/mmm</i>           | $b = 4.52590$ | $\beta = 90$     | Li2 (1b) | -0.00000 | -1.00000 | -0.50000 |
| (0 GPa)                 | $c = 5.50810$ | $\gamma = 120$   | Si (1a)  | -0.00000 | -1.00000 | -0.00000 |

- [S1] G. Kresse and J. Furthmüller, [Phys. Rev. B \*\*54\*\*, 11169 \(1996\)](#).
- [S2] P. Hohenberg and W. Kohn, [Phys. Rev. \*\*136\*\*, B864 \(1964\)](#).
- [S3] W. Kohn and L. J. Sham, [Phys. Rev. \*\*140\*\*, A1133 \(1965\)](#).
- [S4] P. E. Blöchl, [Phys. Rev. B \*\*50\*\*, 17953 \(1994\)](#).
- [S5] K. Kitazawa, M. Naito, T. Itoh, and S. Tanaka, [J. Phys. Soc. JPN. \*\*54\*\*, 2682 \(1985\)](#).
- [S6] L. N. Oliveira, E. K. U. Gross, and W. Kohn, [Phys. Rev. Lett. \*\*60\*\*, 2430 \(1988\)](#).
- [S7] M. Lüders, M. A. L. Marques, N. N. Lathiotakis, A. Floris, G. Profeta, L. Fast, A. Continenza, S. Massidda, and E. K. U. Gross, [Phys. Rev. B \*\*72\*\*, 024545 \(2005\)](#).
- [S8] M. A. L. Marques, M. Lüders, N. N. Lathiotakis, G. Profeta, A. Floris, L. Fast, A. Continenza, E. K. U. Gross, and S. Massidda, [Phys. Rev. B \*\*72\*\*, 024546 \(2005\)](#).
